# Supplementary material for: MiCas9 increases large size gene knock-in rates and reduces undesirable on-target and off-target indel edits
Source: PubMed Central journal article supplement (PMC7695827; doi:10.1038/s41467-020-19842-2), 2020-11-27
Supplement: 41467_2020_19842_MOESM1_ESM.pdf [file 41467_2020_19842_MOESM1_ESM.pdf]

**Supplementary Figure 2. Application of miCas9 in ds-KI experiments.** (a) Illustration of the GFP expressing ds-DNA donor templates for large fragment knock in experiments. (b) Illustration of primer sets used in nest PCR (F1 and R2) to assess non-precise integration at the left junction (F1 and R1) and the right junction (F2 and R2) in the AAVS1 ds-KI experiment using sg-AAVS1 and GFP-donor-1k-AAVS1. (c) Summary of non-precise integration events determined by deep-seq at the junctions in the AAVS1 ds-KI experiment using sg-AAVS1 and GFP-donor-1k-AAVS1. (d) Percentage of GFP<sup>+</sup> cells after GFP ds-KI at the AAVS1 using ds-DNA donor templates of different sizes (1K, 2K or 3K). SA: splicing acceptor. Sp: spCas9. Mi: miCas9. In (d), three independent experiments were performed for each condition. Data are presented as mean  $\pm$  standard error of means (SEM). Unpaired t test (two-tailed) was used to compare data using GraphPad Prism 8 software (GraphPad Software, Inc., San Diego, CA).

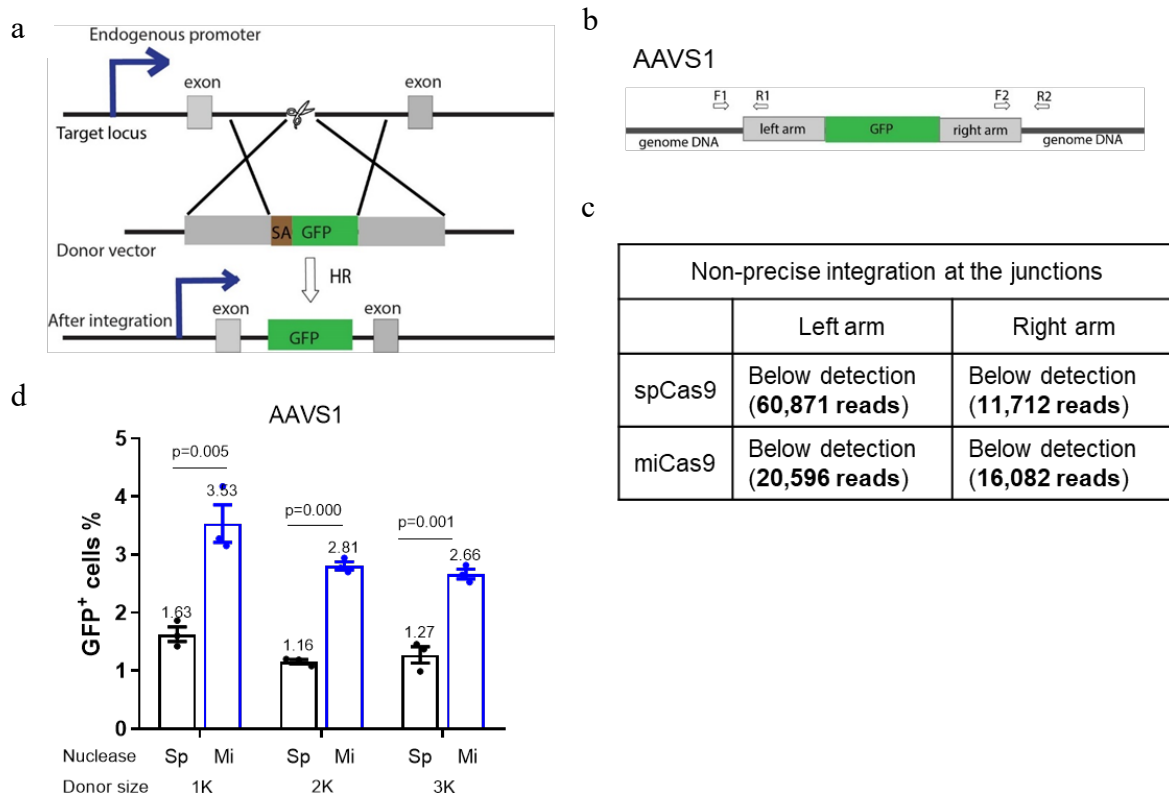

**Supplementary Figure 3. MiCas9 increases KI rates and reduces on-target indel rates in ds-KI applications.** (a) Percentage of GFP<sup>+</sup> cells at the ROSA26 locus in different cell types by miCas9 and spCas9 pDNAs. (b - f) Percentage of GFP<sup>+</sup> cells and on-target indel rates, estimated by T7EI assays, after GFP ds-KI experiments at ROSA26, AHR, ATF4, TGIF2 and RAD21 loci. Sp: spCas9. Mi: miCas9. HE: Cas9-HE. GE: Cas9-GE. Three independent experiments were performed for each condition. Data are presented as mean ± standard error of means (SEM). Unpaired t test (two-tailed) was used to compare data using GraphPad Prism 8 software (GraphPad Software, Inc., San Diego, CA).

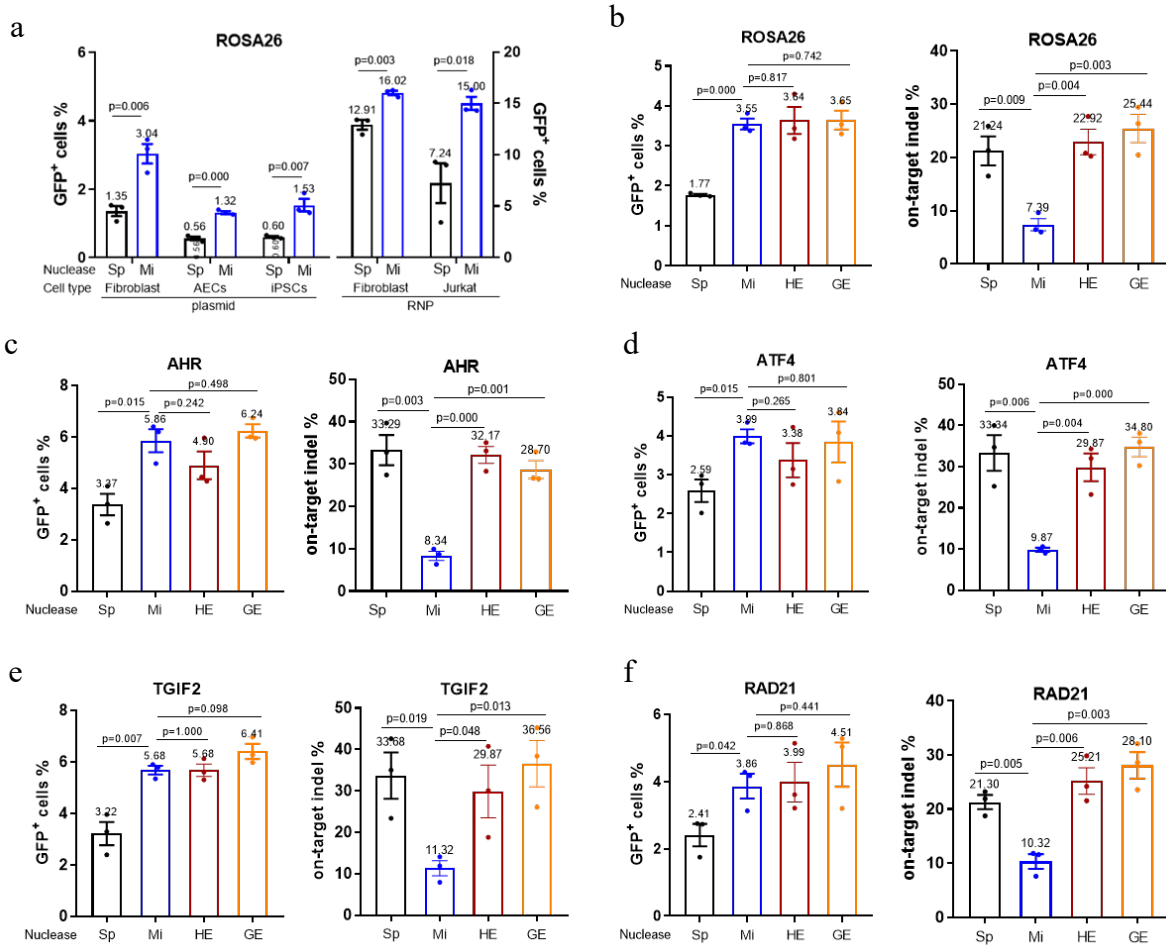

**Supplementary Figure 4. Off-target analysis by spCas9 and miCas9.** (a) T7EI assay for predicted off-target loci (OT1-OT8) for sg-AAVS1. (b) T7EI assay for predicted off-target loci (OT1-OT5) for sg-Rosa. (c) Off-target and on-target indel rates for sg-EMX1 determined by deep-seq. (d) Off-targets (OT-1 and -2) and on-target indel rates for sg2-VEGFA determined by deep-seq. Sp: spCas9. Mi: miCas9. # Reads: Average amplicon reads per sample. In (c) and (d), three independent experiments were performed for each condition. Data are presented as mean  $\pm$  standard error of means (SEM). Unpaired t test (two-tailed) was used to compare data using GraphPad Prism 8 software (GraphPad Software, Inc., San Diego, CA).

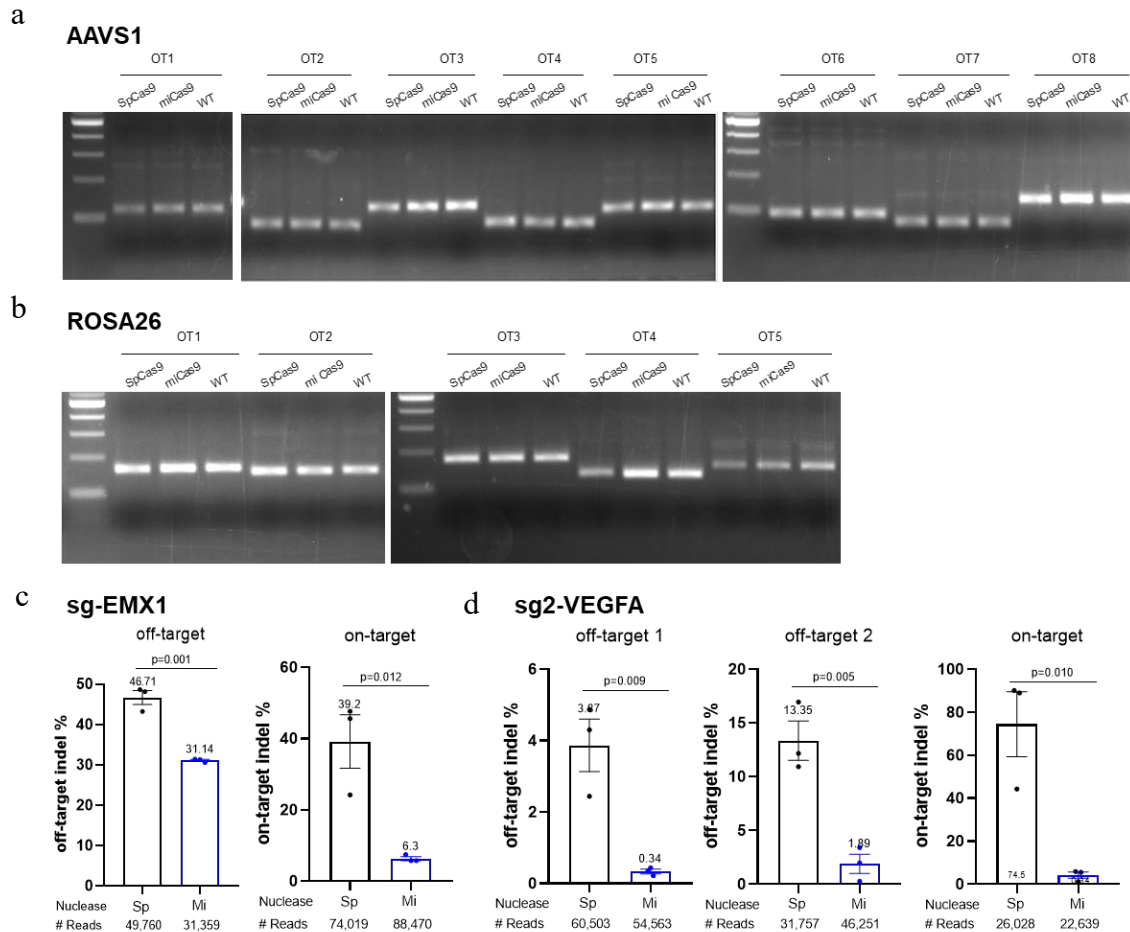

**Supplementary Figure 5.** Indel rates at Guide-seq predicted potential off-target loci associated with sg1-VEGFA by pDNAs of different nucleases. Sp: spCas9. Mi: miCas9. Hy: hypaCas9. Hi: HiFiCas9. HE: Cas9-HE. GE: Cas9-GE. NC: negative control with non-specific gRNA. # Reads: Average amplicon reads per sample. Three independent experiments were performed for each condition. Data are presented as mean  $\pm$  standard error of means (SEM). Unpaired t test (two-tailed) was used to compare data using GraphPad Prism 8 software (GraphPad Software, Inc., San Diego, CA).

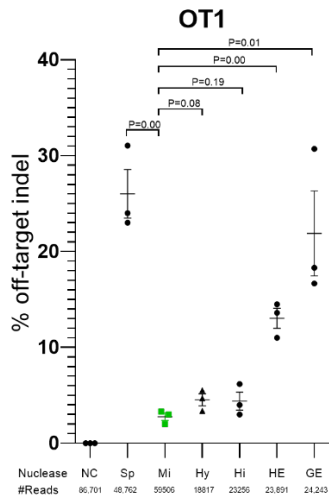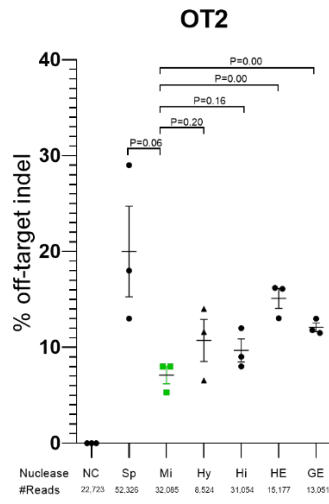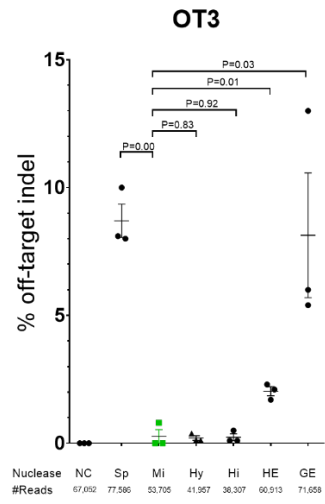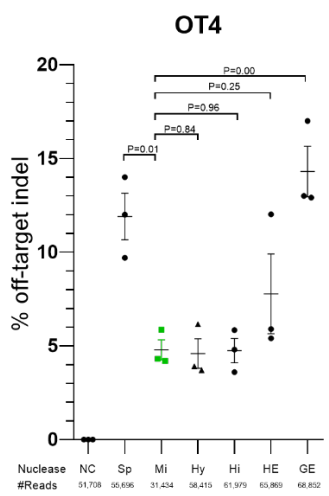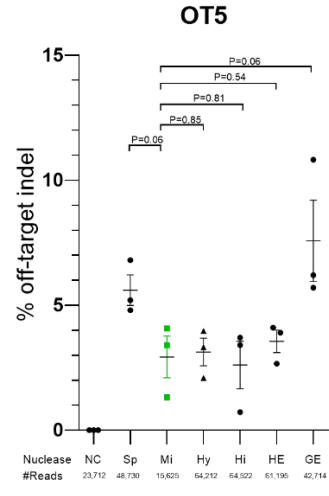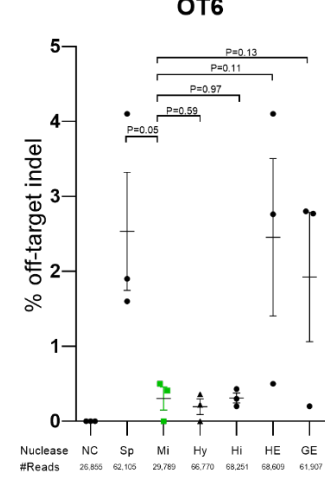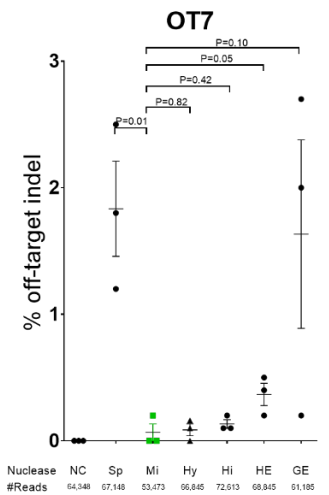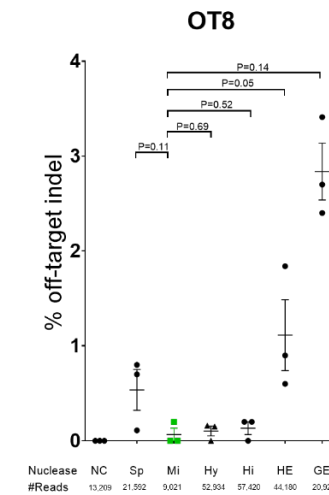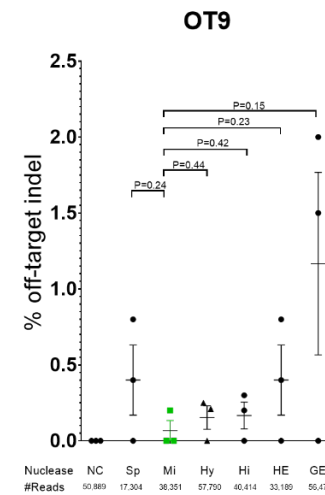

**Supplementary Figure 6.** Indel rates at Guide-seq predicted potential off-target loci associated with sg-FANCF2 by pDNAs of different nucleases. Sp: spCas9. Mi: miCas9. Hy: hypaCas9. Hi: HiFiCas9. HE: Cas9-HE. GE: Cas9-GE. NC: negative control with non-specific gRNA. # Reads: Average amplicon reads per sample. Three independent experiments were performed for each condition. Data are presented as mean  $\pm$  standard error of means (SEM). Unpaired t test (two-tailed) was used to compare data using GraphPad Prism 8 software (GraphPad Software, Inc., San Diego, CA).

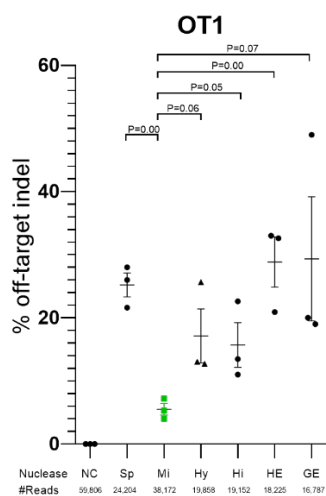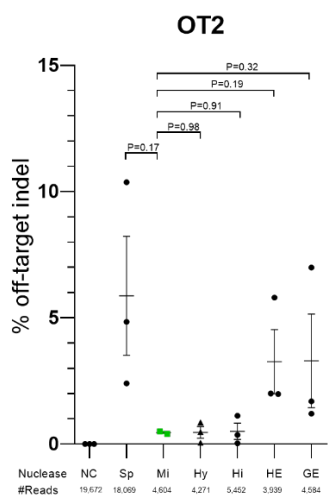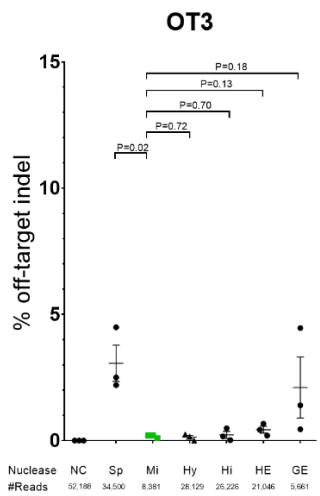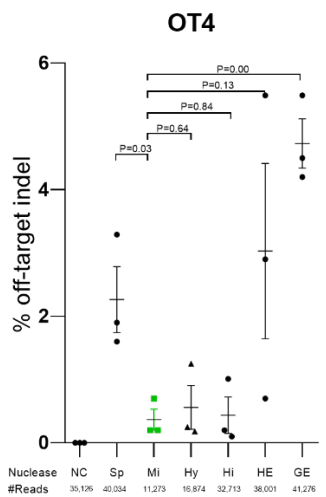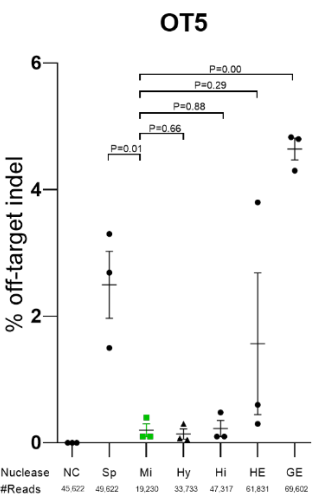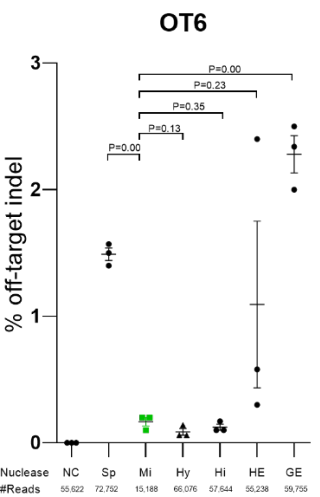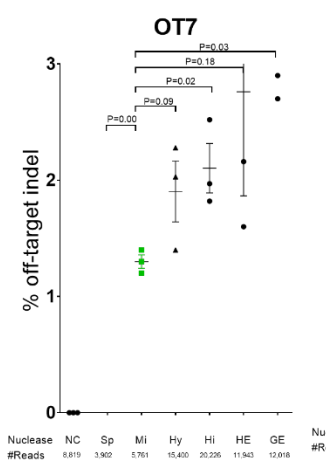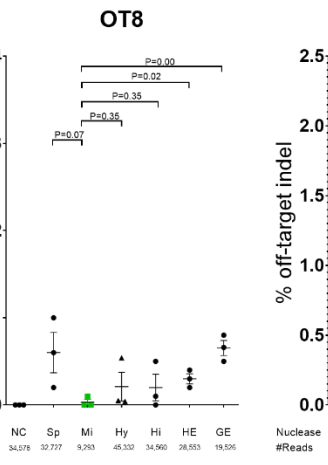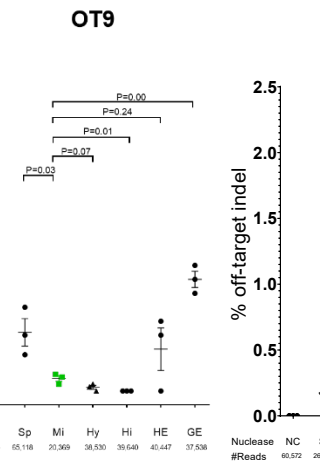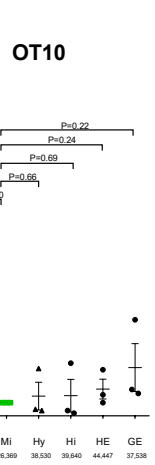



**Supplementary Figure 7. Effects of miCas9 on ss-PGE applications.** (a - c) PGE rates, on-target indel rates, and the Noise/Signal ratio at Mybpc3, NKX2.1 and SOD by spCas9 and miCas9 in human iPSCs. (d) PGE rates, on-target indel rates, and the Noise/Signal ratio at CCR5-del32 by spCas9 and miCas9 in human HSCs. (e - f) PGE rates, on-target indel rates, and Noise/Signal ratio at CCR5-C101X and PSEN1 by different nucleases in human iPSCs. Sp: spCas9. Mi: miCas9. HE: Cas9-HE. GE: Cas9-GE. # Reads: Average amplicon reads per sample. Three independent experiments were performed for each condition. Data are presented as mean  $\pm$  standard error of means (SEM). Unpaired t test (two-tailed) was used to compare data using GraphPad Prism 8 software (GraphPad Software, Inc., San Diego, CA).

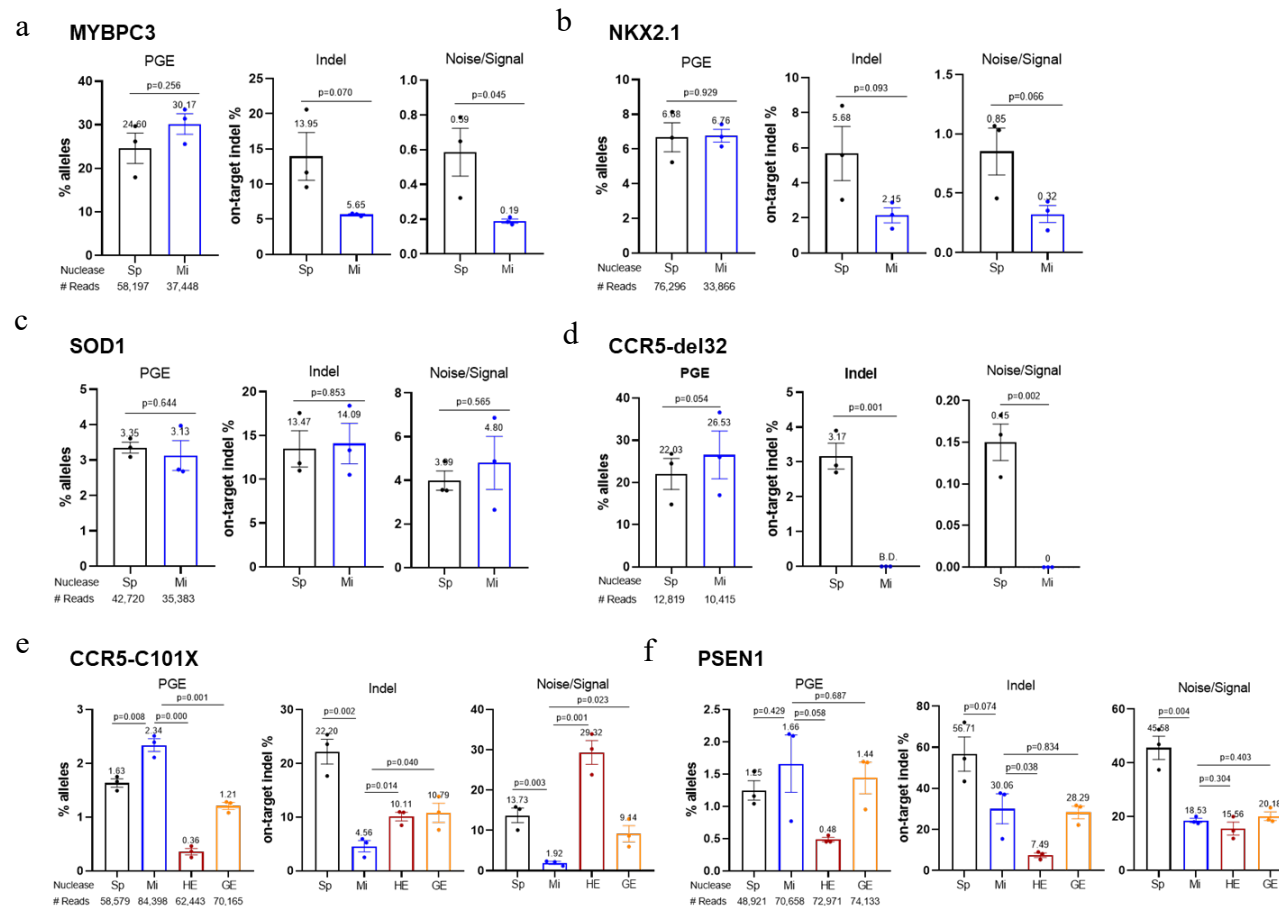

**Supplementary Figure 8. Illustration of the mutated Brex27 coding sequence in MiCas9-mut (bottom) in comparison with wild-type Brex27 in miCas9 (top). Red “-” indicates the missing nucleotide in miCas9-mut.**

**Brex27 coding sequence in miCas9**

GCATTGGATTTCTTAGTAGACTCCCCTTGCCACCTCCGGTGTCCCCATCTGCACGTTTGTGAGCCAGCGGCACAGAAGGCATTTCAAACCGCCACGGAGTTGCGGGTAA  
A L D F L S R L P L P P P V S P I C T F V S P A A Q K A F Q P P R S C G \*

**Mutated Brex27 coding sequence in miCas9-mut**

GCATTGGATT-CCTTAGTAGACTCCCCTTGCCACCTCCGGTGTCCCCATCTGCACGTTTGTGAGCCAGCGGCACAGAAGGCATTTCAAACCGCCACGGAGTTGCGGGTAA  
A L D S L V D S P C H L R C P P S A R L \*

**Supplementary Figure 9.** Representative FACS plot in the GFP ds-KI experiments. Left panel: negative control, wild-type (WT) Jurkat cells without any nuclease treatment. Middle panel: Jurkat cells treated with spCas9 in the RNP form and GFP donor templates. Right panel: Jurkat cells treated with miCas9 in the RNP form and GFP donor templates. Numbers inside the boxes indicate %GFP+ cells.

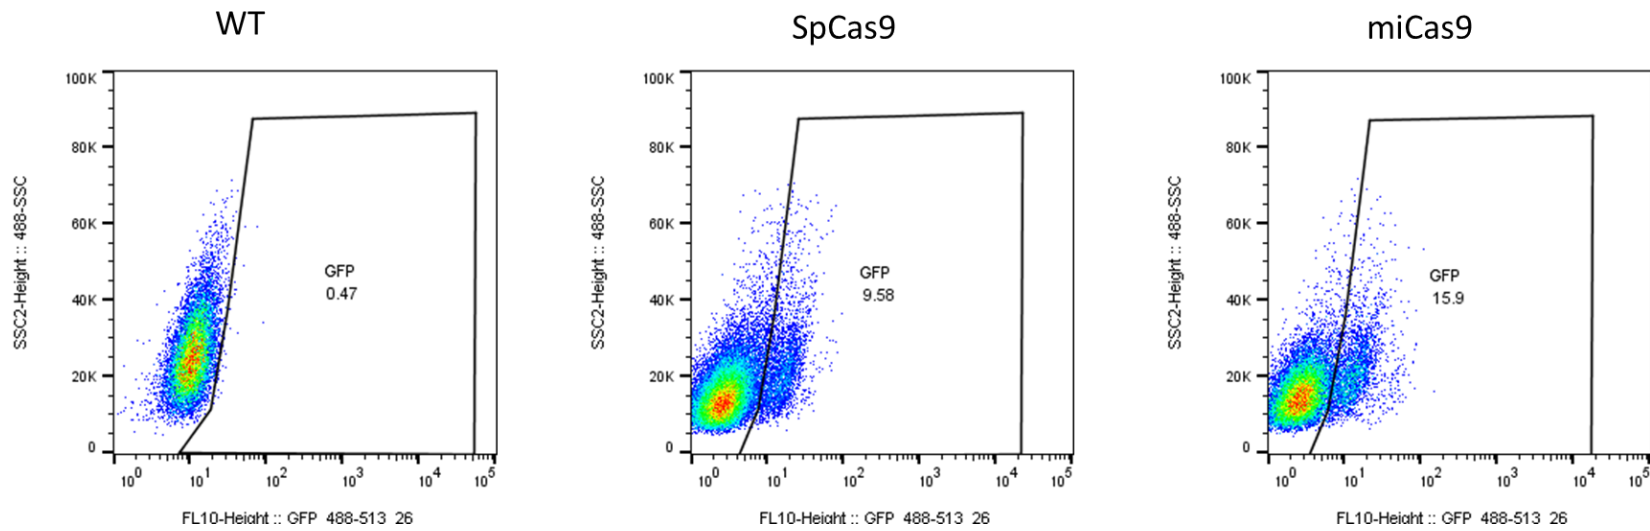

**Supplementary Table 1.** Information of guide RNAs and donors used in the ds-KI applications.

| <b>ds-KI donor name</b> | <b>Target gene</b> | <b>Guide RNA name</b> | <b>Guide RNA</b>          | <b>LHA size (bp)</b> | <b>RHA size (bp)</b> | <b>KI fragment size (bp)</b> |
|-------------------------|--------------------|-----------------------|---------------------------|----------------------|----------------------|------------------------------|
| GFP-donor-1k-AAVS1      | AAVS1              | sg-AAVS1              | GGGGCCACTAGGGACAGGAT TGG  | 804                  | 837                  | 989                          |
| GFP-donor-2k-AAVS1      | AAVS1              | sg-AAVS1              | GGGGCCACTAGGGACAGGAT TGG  | 804                  | 837                  | 2,469                        |
| GFP-donor-3k-AAVS1      | AAVS1              | sg-AAVS1              | GGGGCCACTAGGGACAGGAT TGG  | 804                  | 837                  | 3,339                        |
| GFP-donor-1k-ROSA       | ROSA26             | sg-ROSA               | GTATATAAAACCCCATTTTAT AGG | 667                  | 558                  | 989                          |
| GFP-donor-1k-RAD        | RAD21              | sg-RAD                | TTCTAGCTCCTTATATAATA TGG  | 993                  | 1600                 | 989                          |
| GFP-donor-1k-TGIF       | TGIF2              | sg-TGIF               | CCAGTAGGCATCTGCCAAGA AGG  | 799                  | 726                  | 989                          |
| GFP-donor-1k-AHR        | AHR                | sg-AHR                | CAAAAACCAGGGTCAAAATT GGG  | 708                  | 708                  | 989                          |
| GFP-donor-1k-ATF        | ATF4               | sg-ATF                | AGAAAAGGGTCCCCTAGTTG AGG  | 708                  | 711                  | 989                          |

**Supplementary Table 2.** Guide RNAs used for off-target analysis experiments. Red letters indicate mismatches.

| Guide RNA name | Target gene                                | Off-target #                     | Guide RNA sequence                                 |
|----------------|--------------------------------------------|----------------------------------|----------------------------------------------------|
| Sg-EMX1        | EMX1                                       | On-target                        | GAGTCCGAGCAGAAGAAGAA GGG                           |
|                |                                            | OT1                              | GAGT <b>T</b> AGAGCAGAAGAAGAA AGG                  |
| Sg2-VEGFA      | VEGFA                                      | On-target                        | GACCCCTCCACCCCGCTC CGG                             |
|                |                                            | OT1                              | <b>GG</b> CCCTCCACCCCGCTC TGG                      |
|                |                                            | OT2                              | <b>G</b> CCCTCCACCCCGCTC TGG                       |
| Sg1-VEGFA      | VEGFA                                      | On-target                        | GGTGAGTGAGTGTGTGCGTG TGG                           |
|                |                                            | OT1                              | <b>A</b> GTGAGTGAGTGTGT <b>G</b> TG GGG            |
|                |                                            | OT2                              | <b>T</b> GT <b>G</b> GTGAGTGTGTGCGTG AGG           |
|                |                                            | OT3                              | <b>A</b> GAGAGTGAGTGTGT <b>C</b> ATG AGG           |
|                |                                            | OT4                              | <b>A</b> GT <b>G</b> AATGAGTGTGT <b>G</b> TG TGG   |
|                |                                            | OT5                              | <b>T</b> GTGAGT <b>A</b> AGTGTGT <b>G</b> TG TGG   |
|                |                                            | OT6                              | <b>A</b> GT <b>T</b> GTGAGTGTGTGCGTG TGG           |
|                |                                            | OT7                              | <b>G</b> TTGAGT <b>G</b> AATGTGTGCGTG AGG          |
|                |                                            | OT8                              | <b>A</b> GC <b>G</b> AGT <b>G</b> GGTGTGTGCGTG GGG |
|                | OT9                                        | GGTGAGTGAGT <b>C</b> GTGCGGG TGG |                                                    |
| Sg-FANCF2      | FANCF2                                     | On-target                        | GCTGCAGAAGGGATTCCATG AGG                           |
|                |                                            | OT1                              | GCTGCAGAAGGGATTCC <b>A</b> G GGG                   |
|                |                                            | OT2                              | <b>G</b> ACGCAGAAGGG <b>A</b> CTCCATG GGG          |
|                |                                            | OT3                              | GGT <b>A</b> CAGAAGGG <b>C</b> TTCCATG AGG         |
|                |                                            | OT4                              | GCTGC <b>A</b> AAAAGGATTCC <b>A</b> G GGG          |
|                |                                            | OT5                              | <b>A</b> CTGC <b>A</b> AAATGGATTCCATG GGG          |
|                |                                            | OT6                              | GCT <b>G</b> GAG <b>G</b> AAGGATTCCATG GGG         |
|                |                                            | OT7                              | <b>T</b> GT <b>G</b> AAGAAGGG <b>T</b> TTCCATG AGG |
|                |                                            | OT8                              | <b>G</b> CC <b>A</b> CAGAAGGGATT <b>C</b> TATG AAG |
|                |                                            | OT9                              | GCTGCT <b>G</b> AA <b>C</b> AGATTCCATG GGG         |
| OT10           | GCTGCT <b>G</b> AAAGGATT <b>C</b> TATG GGG |                                  |                                                    |

**Supplementary Table 3.** Guide RNAs and ssODNs used in ss-PGE applications. Red letters indicate mutations.

| PGE locus   | guide RNA sequence        | ssODN donor sequence                                                                                                                                                             |
|-------------|---------------------------|----------------------------------------------------------------------------------------------------------------------------------------------------------------------------------|
| CCR5-del132 | CATACAGTCAGTATCAATTC TGG  | ATCTTTACCAGATCTCAAAAAGAAGGTCTTCATTACACCTGCAGCTCTCATTTTCCATACA--<br>-----TTAAAGATAGTCATCTTGGGGCTGGTCTGCCG<br>CTGCTTGTTCATGGTCATCTGCTACTCG                                         |
| CCR5-C101   | TACAATGTGTCAACTCTTGAC AGG | GAGGATGATGAAGAAGATTCCAGAGAAGAAGCCTATAAAAATAGAGCCCTGTCAAGAGTTGTCA<br>CATTGTATTTCCAAAGTCCCAC TGGGCGGCAGCATAGTGAGCCCAGAAGGGGACAGT                                                   |
| B2M         | CCAGAAAGAGAGAGTAGCGC GAG  | GGGTAGGAGAGACTCACGCTGGATAGCCTCCAGGCCAGAAAGAGAGAGTAGCGCGACGCACAG<br>CTAAGGCCACGGAGCGAGACATCTCGG                                                                                   |
| NKX2.1      | AACAGAAGTACCTGTTCGGC CGG  | GGAAGCGCCGGGTGCTCTTCTCGCAGGCGCAGGTGTACGAGCTGGAGCGACGCTTCAAGCAAC<br>AGAAGTACCTGTTCGGCGCCCGAGCTCGAGCACCTGGCCAGCATGATCCACCTGACGCCACGC<br>AGGTCAAGATCTGGTTCAGAACCACCGCTACAAAATGAAGCG |
| EGFR        | CTGCGTGATGAGCTGCACGG TGG  | ACGTGATGGCCAGCGTGGACAACCCCCACGTGTGCCGCTGCTGGGCATCTGCCTCACCTCTA<br>CAGTCCAAC T GAT T ACCCAGCTCATGCCCTTCGGCTGCCCTCCTGGACTATGTCCGGGAACACA<br>AAGACAATATTGGCTCCCG                    |
| HBB         | CTTGCCCCACAGGGCAGTAA CGG  | TCTGACACAAC T GTT T CACTAGCAACCTCAAACAGACACCATGGTGCATCTGACTCCTGTGG<br>AGAAGTCTGCAGTTACTGCCCTGTGGGGCAAGGTGAACGTGGATGAAGTTGGTGGT GAGGCC<br>TGGGCAG                                 |
| SOD1        | GTCGCCCTTCAGCACGCACA CGG  | TCCGTTGCAGTCCCTCGGAACCAGGACCTCGGCGTGGCCTAGCGAGTTATGGCGACGAAGGTCTG<br>TGTGCGTGTGAAGGGCGACGGCCAGTGCAGGGCATCATCAATTTTCGAGCAGAAGGC                                                   |
| CFTR-G542   | GAGAAAGACAATATAGTTCT TGG  | GCTAGACCAATAATTAGTTATTCACCTTGCTAAAGAAATTTCTTGCTCGTTGACCTCCACTCAG<br>TGTGATTCACCTTCTCAAGA AACTATATTTGCTTTTCTCTGCAAAC T TGGAGATGTCCTATTA<br>CCAAAAATAGAAAATTAGAGAGTCACTTTTAGTAT    |
| PSEN1       | GATTTATACAGAACCACCAGG AGG | ATCTGTGTCTCATGCTCACCTTATAGCACCTGTATTTATACAGAACCACCAGGAGAAATAGTCA<br>CGACAACAATGACACTGATCATGATGGCAGCATTCAG                                                                        |
| MYBPC3      | GGAGTTTGAGTGTGAAGTAT CGG  | GCCCCCTGTGCTCATCACGCGCCCCCTGGAGGACCAGCTGGTGTGTTGGGGCAGCGGGTGGG<br>GTTTGCAG-----GTATCGGAGGAGGGGCGCAAGTCAAATGGTGTGTTCCAGAAGCACGGG<br>GCATGGGTGTTGGGGGCAT                           |

**Supplementary Table 4.** Primers used in the experiments.

| Application                                                   | Name     | Sequence              |
|---------------------------------------------------------------|----------|-----------------------|
| On-target amplicon in ds-KI experiments at AAVS1 & ChIP assay | AAVS1-F  | ATGTGGCTCTGGTCTGGGT   |
|                                                               | AAVS1-R  | GGAAGGAGGAGCCTAAGGA   |
| On-target amplicon in ds-KI experiments at RAD21              | RAD21-F  | AGTCTACAGCTTCTTGGTTC  |
|                                                               | RAD21-R  | ACCTCTGCTCATTATGGAAT  |
| On-target amplicon in ds-KI experiments at Rosa26             | ROSA26-F | GTGCTCTGGAATTGAGCCTG  |
|                                                               | ROSA26-R | AATTGCTCAAAC T TAAGCC |

|                                                          |                 |                       |
|----------------------------------------------------------|-----------------|-----------------------|
| On-target amplicon in ds-KI experiments at ATF4          | ATF4-F          | TGATAGAAGAGGTCCGCAAG  |
|                                                          | ATF4-R          | TATTGGAACACACAGCTACA  |
| On-target amplicon in ds-KI experiments at TFIF2         | TGIF2-F         | ACTGCACACTCCCATCCCTT  |
|                                                          | TGIF2-R         | ACGGAAACCCAGGACAGCTG  |
| On-target amplicon in ds-KI experiments at AHR           | AHR-F           | AGCCAGACCTTTTCTCGAT   |
|                                                          | AHR-R           | TGCTGACGTCCAACAGTGAC  |
| On-target amplicon in ss-PGE experiments at SOD          | SOD-F           | GTCTCGGAACCCAGGACCTCG |
|                                                          | SOD-R           | GACCCGCTCCTAGCAAAGGTG |
| On-target amplicon in ss-PGE experiments at PSEN1        | PSEN1-F         | TGCACTCAATTCTGAATGCT  |
|                                                          | PSEN1-R         | GTGACAAGAATACCCAACCA  |
| On-target amplicon in ss-PGE experiments at HBB          | HBB-F           | TGTCTGTAAACCTTGATACC  |
|                                                          | HBB-R           | GAGCCATCTATTGCTTACAT  |
| On-target amplicon in ss-PGE experiments at EGFR         | EGFR-F          | TGATGGCCAGCGTGGACAAC  |
|                                                          | EGFR-R          | ACCACTTGAGCAGGTACTGGG |
| On-target amplicon in ss-PGE experiments at MYBPC3       | MYBPC3-F        | ATGCCCCGTGCTTCTGGAAC  |
|                                                          | MYBPC3-R        | TCAGGGGAGCCAACCTCAT   |
| On-target amplicon in ss-PGE experiments at B2M          | B2M-F           | CATTCGGGCCGAGATGTCTCG |
|                                                          | B2M-R           | TCACGGAGCGAGAGACACAG  |
| On-target amplicon in ss-PGE experiments at CCR5-C101    | CCR5 C101X-F1   | TCACTATGCTGCCGCCAGT   |
|                                                          | CCR5 C101X-R1   | ACGACAGCCAGGTACCTATCG |
| On-target amplicon in ss-PGE experiments at CCR5-C101    | CCR5 C101X-F2   | TCTGACCTGTTTTCTCTTCT  |
|                                                          | CCR5 C101X-R2   | CAGGTACCTATCGATTGTCA  |
| On-target amplicon in ss-PGE experiments at NKX2.1       | NKX2.1-F        | CGTCAGGTGGATCATGTCTGG |
|                                                          | NKX2.1-R        | TGTGCGTTTGTGCGTTACAG  |
| On-target amplicon in ss-PGE experiments at CCR5-delta32 | CCR5 DELTA32-F1 | CTGTGTTTGCTTTAAAGCCA  |
|                                                          | CCR5 DELTA32-R1 | GATTCCCGAGTAGCAGATGA  |
| On-target amplicon in ss-PGE experiments at CCR5-delta32 | CCR5 DELTA32-F2 | CCCAGGAATCATCTTTACCAG |
|                                                          | CCR5 DELTA32-R2 | GATTCCCGAGTAGCAGATGA  |
| On-target amplicon in ss-PGE experiments at CFTR-G542    | CFTR-G542X-F    | GTGCCTTCAAATTCAGATT   |
|                                                          | CFTR-G542X-R    | TTACAGCAAATGCTTGCTAG  |
| Off-target amplicon of sg-Rosa26 at OT1                  | ROSA-OT-F1      | CAGCTTGACTATTTGGTCA   |
|                                                          | ROSA-OT-R1      | TACCCTATGCTGCTACTCAC  |
| Off-target amplicon of sg-Rosa26 at OT2                  | ROSA-OT-F2      | AGAGCTGTCTTAGTTCTCC   |
|                                                          | ROSA-OT-R2      | GAAGCCACTGTGGAGAGTCA  |
| Off-target amplicon of sg-Rosa26 at OT3                  | ROSA-OT-F3      | GCTCCAGTGGATACATGAA   |
|                                                          | ROSA-OT-R3      | TGCATAGCCCCCTTGCATTA  |
| Off-target amplicon of sg-Rosa26 at OT4                  | ROSA-OT-F4      | GGATTTCTGGAAGGTTCTGC  |
|                                                          | ROSA-OT-R4      | ACCACAGAAAAACACAGAGTC |
| Off-target amplicon of sg-Rosa26 at OT5                  | ROSA-OT-F5      | CCTTCATCGACCTCTGACTC  |
|                                                          | ROSA-OT-R5      | GCTCATGCAGTAGAGGCTAG  |
| Off-target amplicon of sg-AAVS1 at OT1                   | AAVS1-OT-F1     | GCTCCACTGTGAGAAGCCTT  |
|                                                          | AAVS1-OT-R1     | CAGAGCTGGGTACAGTGAGG  |
| Off-target amplicon of sg-AAVS1 at OT2                   | AAVS1-OT-F2     | GTGATGGGTTGGCACTGAT   |

|                                          |             |                            |
|------------------------------------------|-------------|----------------------------|
|                                          | AAVS1-OT-R2 | GGGACAGCTATACTGCTCC        |
| Off-target amplicon of sg-AAVS1 at OT3   | AAVS1-OT-F3 | ACAGAGTCCCACAACGATGG       |
|                                          | AAVS1-OT-R3 | AACTCCAGGGGTACAGGAGG       |
| Off-target amplicon of sg-AAVS1 at OT4   | AAVS1-OT-F4 | CTCAGGCCACATTCGCCA         |
|                                          | AAVS1-OT-R4 | TAAGCTGACCTGCTCCGTTG       |
| Off-target amplicon of sg-AAVS1 at OT5   | AAVS1-OT-F5 | GGATGCTGATGGGCTGTTCT       |
|                                          | AAVS1-OT-R5 | CAGGTGGAGGCTGCCATTTA       |
| Off-target amplicon of sg-AAVS1 at OT6   | AAVS1-OT-F6 | CATAGGACCAGCCAGCAGAG       |
|                                          | AAVS1-OT-R6 | AGGCAAACCAAGTACACTTTGT     |
| Off-target amplicon of sg-AAVS1 at OT7   | AAVS1-OT-F7 | CACCAGTGGAAATCAGGGGTC      |
|                                          | AAVS1-OT-R7 | ACATGGCTGACTGCTCCATC       |
| Off-target amplicon of sg-AAVS1 at OT8   | AAVS1-OT-F8 | AACTCTCTAACAGCTGGGGC       |
|                                          | AAVS1-OT-R8 | GAGCTGCTCCTTCTTGGGAA       |
| Off-target amplicon of sg-FANCF2 at OT10 | F2-OT10-F   | GAATGCATTGCTTAATGTGC       |
|                                          | F2-OT10-R   | ATACTTAACTCCCCTGACTG       |
| Off-target amplicon of sg-FANCF2 at OT9  | F2-OT9-F    | TGCTGCAGGGATCTCTAACA       |
|                                          | F2-OT9-R    | TATTCCTCACCGTGAACCTA       |
| Off-target amplicon of sg-FANCF2 at OT8  | F2-OT8-F    | CTTCTAACAGTGAGTGGGTC       |
|                                          | F2-OT8-R    | CTTCTTAGCCCGAGTAAGAC       |
| Off-target amplicon of sg-FANCF2 at OT7  | F2-OT7-F    | AGCCTGGGCAACAGAGCAAG       |
|                                          | F2-OT7-R    | CTGTGTACAAAGCCAGGGT        |
| Off-target amplicon of sg-FANCF2 at OT6  | F2-OT6-F    | GTGAACCCACCAAGGCGGA        |
|                                          | F2-OT6-R    | AGGAGACACTTCTGTGGGGC       |
| Off-target amplicon of sg-FANCF2 at OT5  | F2-OT5-F    | TGATAGAGGCATCTGCTACT       |
|                                          | F2-OT5-R    | CTGGGAATTGTCTCATCAG        |
| Off-target amplicon of sg-FANCF2 at OT4  | F2-OT4-F    | TACTGTCCACCATCTCAGAG       |
|                                          | F2-OT4-R    | TCAGAGAGTAAGGACCTGGA       |
| Off-target amplicon of sg-FANCF2 at OT3  | F2-OT3-F    | TAAGGGGACCTTGAATAT         |
|                                          | F2-OT3-R    | AGTCCACAGTTCATAAACAA       |
| Off-target amplicon of sg-FANCF2 at OT2  | F2-OT2-F    | CAGCATGGGGGCAAAGAGCA       |
|                                          | F2-OT2-R    | TCCAGGGCCCTATCTCAGCT       |
| Off-target amplicon of sg-FANCF2 at OT1  | F2-OT1-F    | GCCCTACTGACTGACAGAGG       |
|                                          | F2-OT1-R    | TCTCCTGTTCTGGCTCCCTT       |
| Off-target amplicon of sg-EMX1           | EMX1-OT1-F  | GTGGGGAGATTGCACTCTGTGGAGG  |
|                                          | EMX1-OT1-R  | GCTTTTATACCATCTTGGGGTTACAG |
| Off-target amplicon of sg1-VEGFA at OT1  | VEGF1-OT1-F | TATCGCTCATTTCCTACGGC       |
|                                          | VEGF1-OT1-R | GCAGTGAGGAGGTGGTTCTT       |
| Off-target amplicon of sg1-VEGFA at OT2  | VEGF1-OT2-F | TTCAGGGTGTGCAATGTGA        |
|                                          | VEGF1-OT2-R | TTCTGGGAATCTAATGTATGGCA    |
| Off-target amplicon of sg1-VEGFA at OT3  | VEGF1-OT3-F | TTGGATCATACGGCCGGTTT       |
|                                          | VEGF1-OT3-R | AAAGTTTCACATGGTTGCGG       |
| Off-target amplicon of sg1-VEGFA at OT4  | VEGF1-OT4-F | GTTCACTCGGCTACAGGGAG       |
|                                          | VEGF1-OT4-R | ATAAGGGGCAAGTTCTGGGC       |



|                                         |              |                         |
|-----------------------------------------|--------------|-------------------------|
| Off-target amplicon of sg1-VEGFA at OT5 | VEGFA1-OT5-F | TTGCTGTGTCTTCCTTCTGC    |
|                                         | VEGFA1-OT5-R | AGCTGTATGTGAGTCCCTGA    |
| Off-target amplicon of sg1-VEGFA at OT6 | VEGFA1-OT6-F | CCCCATTGCCTAGAGAGTCA    |
|                                         | VEGFA1-OT6-R | AACCCTTGGGAATCTATCTTGAA |
| Off-target amplicon of sg1-VEGFA at OT7 | VEGFA1-OT7-F | AGACCCAGTTCCAAGCCAG     |
|                                         | VEGFA1-OT7-R | TCTCCGGAAGTGCCTTGC      |
| Off-target amplicon of sg1-VEGFA at OT8 | VEGFA1-OT8-F | AGCACCCCTTGACGTCTGG     |
|                                         | VEGFA1-OT8-R | AGCTCACCTTCCAGTTCGG     |
| Off-target amplicon of sg1-VEGFA at OT9 | VEGFA1-OT9-F | GTCTCCAGGCCACAGAGTAG    |
|                                         | VEGFA1-OT9-R | GCACCCCAACACCTACATCT    |
| Off-target amplicon of sg2-VEGFA at OT1 | VEGFA2-OT1-F | CAAGATGTGCACTTGGGCTA    |
|                                         | VEGFA2-OT1-R | GCAGCCTATTGTCTCCTGGT    |
| Off-target amplicon of sg2-VEGFA at OT2 | VEGFA2-OT2-F | GTTGCTCTTTGTTGAGAGGG    |
|                                         | VEGFA2-OT2-R | TCTTGCTCTGACCTTGTTTG    |
| Nest PCR for junctions of AAVS1         | JUNCTION-F1  | GAGCTCTACTGGCTTCTGCG    |
|                                         | JUNCTION-F2  | CAGGCCAAGTAGGTGGCCTG    |
|                                         | JUNCTION-F3  | TGCATTCTAGTTGTGGTTTG    |
|                                         | JUNCTION-R1  | GCCGTAGAGGTGACCCAGGC    |
|                                         | JUNCTION-R2  | CTTCTCGTCCACCATCTCA     |
|                                         | JUNCTION-R3  | AGCTCGACCAGGATGGGCAC    |
